# Supplementary material for: An efficient chemical fixation of nitric oxide: convenient and practical synthesis of 1,2,3-oxadiazole 3-oxidesElectronic supplementary information (ESI) available: crystal and molecular structure of 2a. See http://www.rsc.org/suppdata/cc/b3/b311382e/
Source: Royal Society of Chemistry journal article supplement (doi:10.1039/b311382e), 2004-01-01
Supplement: b311382e.pdf [file b311382e.pdf]

# †Crystal and molecular structure of 5-[2-(4-methoxyphenyl)ethyl]-1,2,3-oxadiazole 3-oxide (2a)

## Abstract

We present the crystal and molecular structure of 5-[2-(4-methoxyphenyl)ethyl]-1,2,3-oxadiazole 3-oxide (2a)

## Comment

The study of the titled structure was undertaken to establish its three dimensional structure. Geometries are tabulated below. All diagrams and calculations were performed using maXus (Bruker Nonius, Delft & MacScience, Japan).

## Experimental

### Crystal data

$C_{11}H_{12}N_2O_3$   
 $C_{11}H_{12}N_2O_3$   
 $M_r = 220.228$   
Monoclinic  
P2<sub>1</sub>/c  
a = 5.6130 (4) Å  
b = 8.9250 (5) Å  
c = 22.154 (2) Å  
 $\alpha = 90.00^\circ$   
 $\beta = 95.563 (3)^\circ$   
 $\gamma = 90.00^\circ$   
V = 1104.60 (13) Å<sup>3</sup>

Z = 4  
 $D_x = 1.324 \text{ Mg m}^{-3}$   
Density measured by: not measured  
fine-focus sealed tube  
Mo K $\alpha$  radiation  
 $\lambda = 0.71073$   
 $\mu = 0.098 \text{ mm}^{-1}$   
T = 298 K  
plate  
Colourless  
Crystal source: Local laboratory

### Data collection

DIP Image plate  
IP  
Absorption correction: none  
1973 measured reflections  
1863 independent reflections  
1417 observed reflections

Criterion:  $>2\sigma(I)$   
 $\theta_{\text{max}} = 25.78^\circ$   
h = 0  $\leq$  6  
k = 0  $\leq$  10  
l = -26  $\leq$  26

### Refinement

Refinement on  $F^2$   
fullmatrix least squares refinement  
R(all) = 0.0674  
R(gt) = 0.0538  
wR(ref) = 0.1580  
wR(gt) = 0.1412  
S(ref) = 1.065

1863 reflections  
145 parameters  
0 restraints  
Only coordinates of H atoms refined  
Calculated weights calc  
 $\chi^2/\nu_{\text{max}} = 0.000$   
 $\chi^2_{\text{max}} = 0.168 \text{ e} \text{ \AA}^3$   
 $\chi^2_{\text{min}} = -0.305 \text{ e} \text{ \AA}^3$

Extinction correction: none  
 Atomic scattering factors from International

Tables Vol C Tables 4.2.6.8 and 6.1.1.4

Data collection: DIP Image plate  
 Cell refinement: Scalepack(HKL)  
 Data reduction: maXus (Mackay et al., 1999)  
 Program(s) used to refine structure: *SHELXL-97* (Sheldrick, 1997)

Table 1. *Fractional atomic coordinates and equivalent isotropic thermal parameters ( $\text{\AA}^2$ )*

$$U_{eq} = 1/3 \sum_i \sum_j U_{ij} a_i^* a_j^* a_i a_j$$

|      | x          | y             | z            | $U_{eq}$   | Occ |
|------|------------|---------------|--------------|------------|-----|
| N1   | 0.2762 (3) | 0.17174 (19)  | 0.51164 (8)  | 0.0784 (5) | 1   |
| C2   | 0.8731 (4) | -0.0575 (2)   | 0.18234 (8)  | 0.0697 (5) | 1   |
| O3   | 1.0095 (3) | -0.08965 (19) | 0.13600 (6)  | 0.0922 (5) | 1   |
| C4   | 0.6115 (4) | -0.0120 (2)   | 0.28184 (9)  | 0.0724 (5) | 1   |
| C5   | 0.2837 (4) | 0.1031 (2)    | 0.45599 (9)  | 0.0737 (5) | 1   |
| C6   | 0.4670 (4) | 0.1648 (2)    | 0.43143 (9)  | 0.0726 (5) | 1   |
| C7   | 0.9407 (4) | -0.1268 (2)   | 0.23726 (9)  | 0.0785 (6) | 1   |
| O8   | 0.5675 (3) | 0.26679 (19)  | 0.47131 (8)  | 0.1000 (6) | 1   |
| C9   | 0.5465 (4) | 0.0547 (2)    | 0.22634 (10) | 0.0798 (6) | 1   |
| C10  | 0.6751 (4) | 0.0341 (2)    | 0.17703 (9)  | 0.0764 (6) | 1   |
| O11  | 0.1291 (3) | 0.14538 (19)  | 0.55044 (7)  | 0.1003 (6) | 1   |
| C12  | 0.5798 (4) | 0.1449 (2)    | 0.37425 (9)  | 0.0783 (6) | 1   |
| C13  | 0.8125 (4) | -0.1031 (2)   | 0.28604 (9)  | 0.0776 (6) | 1   |
| C14  | 0.4740 (4) | 0.0163 (3)    | 0.33594 (10) | 0.0849 (6) | 1   |
| C15  | 0.9760 (6) | -0.0029 (3)   | 0.08279 (11) | 0.1055 (8) | 1   |
| N16  | 0.4443 (4) | 0.2703 (2)    | 0.52256 (9)  | 0.0999 (6) | 1   |
| H5   | 0.1497     | 0.0168        | 0.4432       | 0.088      | 1   |
| H7   | 1.0767     | -0.1924       | 0.2415       | 0.094      | 1   |
| H9   | 0.4054     | 0.1160        | 0.2214       | 0.096      | 1   |
| H10  | 0.6288     | 0.0842        | 0.1394       | 0.092      | 1   |
| H12A | 0.5624     | 0.2348        | 0.3504       | 0.094      | 1   |
| H12B | 0.7467     | 0.1232        | 0.3837       | 0.094      | 1   |
| H13  | 0.8642     | -0.1512       | 0.3238       | 0.093      | 1   |
| H14A | 0.3117     | 0.0417        | 0.3220       | 0.102      | 1   |
| H14B | 0.4756     | -0.0726       | 0.3604       | 0.102      | 1   |
| H15A | 1.0821     | -0.0378       | 0.0543       | 0.127      | 1   |
| H15B | 1.0097     | 0.1004        | 0.0923       | 0.127      | 1   |
| H15C | 0.8133     | -0.0125       | 0.0654       | 0.127      | 1   |

Table 2. *Anisotropic displacement parameters ( $\text{\AA}^2$ )*

|    | $U_{11}$    | $U_{12}$    | $U_{13}$    | $U_{22}$    | $U_{23}$    | $U_{33}$    |
|----|-------------|-------------|-------------|-------------|-------------|-------------|
| N1 | 0.0870 (13) | 0.0062 (9)  | 0.0180 (9)  | 0.0727 (10) | 0.0007 (8)  | 0.0774 (10) |
| C2 | 0.0723 (12) | -0.0003 (9) | 0.0069 (9)  | 0.0687 (11) | -0.0031 (8) | 0.0680 (11) |
| O3 | 0.1005 (12) | 0.0220 (9)  | 0.0208 (8)  | 0.1011 (11) | 0.0025 (7)  | 0.0773 (9)  |
| C4 | 0.0704 (13) | -0.0137 (9) | 0.0106 (9)  | 0.0723 (12) | -0.0049 (8) | 0.0752 (12) |
| C5 | 0.0769 (13) | 0.0007 (9)  | 0.0126 (9)  | 0.0683 (11) | -0.0002 (9) | 0.0770 (12) |
| C6 | 0.0744 (13) | 0.0010 (9)  | 0.0085 (9)  | 0.0658 (11) | -0.0010 (8) | 0.0777 (12) |
| C7 | 0.0737 (13) | 0.0092 (10) | 0.0031 (10) | 0.0811 (13) | 0.0051 (9)  | 0.0799 (13) |
| O8 | 0.1053 (12) | -0.0291 (9) | 0.0266 (9)  | 0.1013 (12) | -0.0220 (8) | 0.0966 (11) |
| C9 | 0.0746 (13) | 0.0114 (10) | 0.0082 (10) | 0.0797 (13) | 0.0007 (10) | 0.0853 (14) |

|     |             |              |             |             |              |             |
|-----|-------------|--------------|-------------|-------------|--------------|-------------|
| C10 | 0.0820 (14) | 0.0101 (10)  | 0.0034 (10) | 0.0744 (12) | 0.0057 (9)   | 0.0718 (12) |
| O11 | 0.1161 (14) | -0.0030 (9)  | 0.0390 (10) | 0.0974 (12) | -0.0042 (8)  | 0.0930 (11) |
| C12 | 0.0774 (13) | -0.0061 (10) | 0.0177 (10) | 0.0745 (12) | -0.0008 (9)  | 0.0850 (13) |
| C13 | 0.0790 (14) | -0.0051 (10) | 0.0014 (9)  | 0.0823 (13) | 0.0092 (9)   | 0.0704 (11) |
| C14 | 0.0810 (15) | -0.0184 (11) | 0.0182 (11) | 0.0949 (15) | -0.0082 (10) | 0.0809 (13) |
| C15 | 0.130 (2)   | 0.0091 (16)  | 0.0361 (14) | 0.1083 (18) | 0.0093 (13)  | 0.0826 (15) |
| N16 | 0.1118 (16) | -0.0216 (12) | 0.0246 (11) | 0.1001 (14) | -0.0195 (10) | 0.0907 (13) |

Table 3 . Geometric parameters ( $\text{\AA}$ ,  $^\circ$ )

|            |             |               |           |
|------------|-------------|---------------|-----------|
| N1—O11     | 1.270 (2)   | C9—C10        | 1.379 (3) |
| N1—N16     | 1.295 (3)   | C12—C14       | 1.514 (3) |
| N1—C5      | 1.381 (3)   | C5—H5         | 1.0942    |
| C2—O3      | 1.369 (2)   | C7—H7         | 0.9600    |
| C2—C10     | 1.376 (3)   | C9—H9         | 0.9599    |
| C2—C7      | 1.384 (3)   | C10—H10       | 0.9600    |
| O3—C15     | 1.408 (3)   | C12—H12A      | 0.9601    |
| C4—C9      | 1.383 (3)   | C12—H12B      | 0.9600    |
| C4—C13     | 1.387 (3)   | C13—H13       | 0.9600    |
| C4—C14     | 1.508 (3)   | C14—H14A      | 0.9600    |
| C5—C6      | 1.329 (3)   | C14—H14B      | 0.9599    |
| C6—O8      | 1.353 (2)   | C15—H15A      | 0.9601    |
| C6—C12     | 1.481 (3)   | C15—H15B      | 0.9601    |
| C7—C13     | 1.371 (3)   | C15—H15C      | 0.9600    |
| O8—N16     | 1.386 (3)   |               |           |
| O11—N1—N16 | 120.59 (18) | C13—C7—H7     | 119.3     |
| O11—N1—C5  | 126.86 (19) | C2—C7—H7      | 120.4     |
| N16—N1—C5  | 112.54 (18) | C10—C9—H9     | 118.3     |
| O3—C2—C10  | 124.48 (18) | C4—C9—H9      | 119.4     |
| O3—C2—C7   | 116.10 (18) | C2—C10—H10    | 120.0     |
| C10—C2—C7  | 119.40 (19) | C9—C10—H10    | 120.5     |
| C2—O3—C15  | 118.28 (18) | C6—C12—H12A   | 110.0     |
| C9—C4—C13  | 117.06 (19) | C14—C12—H12A  | 108.2     |
| C9—C4—C14  | 121.6 (2)   | C6—C12—H12B   | 109.1     |
| C13—C4—C14 | 121.35 (19) | C14—C12—H12B  | 106.9     |
| C6—C5—N1   | 105.85 (19) | H12A—C12—H12B | 109.5     |
| C5—C6—O8   | 107.59 (18) | C7—C13—H13    | 118.7     |
| C5—C6—C12  | 135.45 (19) | C4—C13—H13    | 119.8     |
| O8—C6—C12  | 116.95 (18) | C4—C14—H14A   | 109.1     |
| C13—C7—C2  | 120.3 (2)   | C12—C14—H14A  | 108.0     |
| C6—O8—N16  | 109.88 (16) | C4—C14—H14B   | 109.4     |
| C10—C9—C4  | 122.3 (2)   | C12—C14—H14B  | 109.2     |
| C2—C10—C9  | 119.47 (19) | H14A—C14—H14B | 109.5     |
| C6—C12—C14 | 113.16 (17) | O3—C15—H15A   | 109.3     |
| C7—C13—C4  | 121.53 (19) | O3—C15—H15B   | 109.7     |
| C4—C14—C12 | 111.65 (17) | H15A—C15—H15B | 109.5     |
| N1—N16—O8  | 104.13 (17) | O3—C15—H15C   | 109.3     |
| C6—C5—H5   | 136.6       | H15A—C15—H15C | 109.5     |
| N1—C5—H5   | 117.6       | H15B—C15—H15C | 109.5     |

## References

Mackay, S., Gilmore, C. J., Edwards, C., Stewart, N. & Shankland, K. (1999). maXus Computer Program for the Solution and Refinement of Crystal Structures. Bruker Nonius, The Netherlands, MacScience, Japan & The University of Glasgow.

Johnson, C. K. (1976). *ORTEP--II*. A Fortran Thermal--Ellipsoid Plot Program. Report ORNL-5138. Oak Ridge National Laboratory, Oak Ridge, Tennessee, USA.

Altomare, A., Burla, M. C., Camalli, M., Cascarano, G. L., Giacovazzo, C., Guagliardi, A., Moliterni, A. G. G & Spagna, R. (1999). *J. Appl. Cryst.* 32, 115--119.

Sheldrick, G. M. (1997). *SHELXL97*. Program for the Refinement of Crystal Structures. University of Göttingen, Germany.

<Figure captions>
